# Supplementary material
Source: PubMed Central journal article supplement (PMC3048115)
Supplement: 1100446108_pnas.201100446SI.pdf [file 1100446108_pnas.201100446SI.pdf]

# Supporting Information

Hiratsuka et al. 10.1073/pnas.1100446108

## Materials and Methods

**PCR Array.** Total RNA samples were isolated from frozen tissues using TRIzol (Invitrogen). Gene expression levels in EB-high and EB-low areas [after i.v. LLC tumor-conditioned medium (LTCM) and recombinant VEGF infusion] were measured using Mouse Endothelial Cell Biology PCR array plates (SABiosciences).

**Immunoprecipitation and Western Blot Analysis.** Lung tissues were lysed with lysis buffer [50 mM Hepes (pH 7.4), 1% Triton X-100, 150 mM sodium chloride, and 1 mM EGTA and 5 mM EDTA] with protease inhibitor mixture, 1 mM phenylmethylsulfonyl fluoride, 1 mM sodium fluoride, and 1 mM sodium orthovanadate. For FRNK detection, we used the rabbit antibody to the carboxyl terminal FAK (C-20; Santa Cruz Biotechnology).

**Isolation of Endothelial Cells.** Minced mouse lungs were digested with 2 mg/mL of collagenase type 1A, 2 mg/mL of hyaluronidase, and DNase at 37 °C for 30 min, and then filtered through a 70- $\mu$ m cell strainer (all from Sigma). The cellular filtrate was washed, and a layer containing endothelial cells was separated using Histopaque (Sigma). Cells from this layer were incubated with magnetic Dynabeads (Dyna) coated with anti-rat IgG antibody, to which rat anti-mouse CD31 and MECA32 antibodies were attached. Cells were separated using a magnetic separator and then cultured on a collagen-coated plate in VEGF-free EBM2 medium (Lonza) overnight.

**Soluble Protein Measurement in Cell Culture Supernatant.** We measured mouse VEGF and mouse placental growth factor levels using the ELISA plate from R&D Systems, according to the manufacturer's instructions.

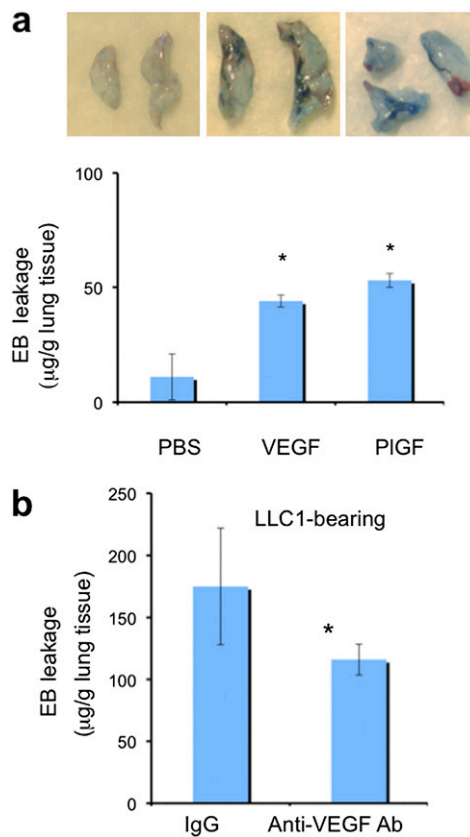

**Fig. S1.** (A) *Upper:* Distinct macroscopic regions of Evans Blue (EB) leakage in the lungs of healthy mice after stimulation by recombinant (r)VEGF or recombinant placental growth factor (rPIGF). *Lower:* Total EB leakage into lungs of healthy mice 3 h after stimulation with rVEGF or rPIGF. \* $P < 0.05$ ,  $n = 6$  and  $n = 4$ , respectively. (B) Total EB leakage into the lungs of mice bearing LLC primary tumors measured 3.5 h after EB injection, with or without treatment with an anti-VEGF antibody.  $n = 4$ ,  $\pm$  SEM.







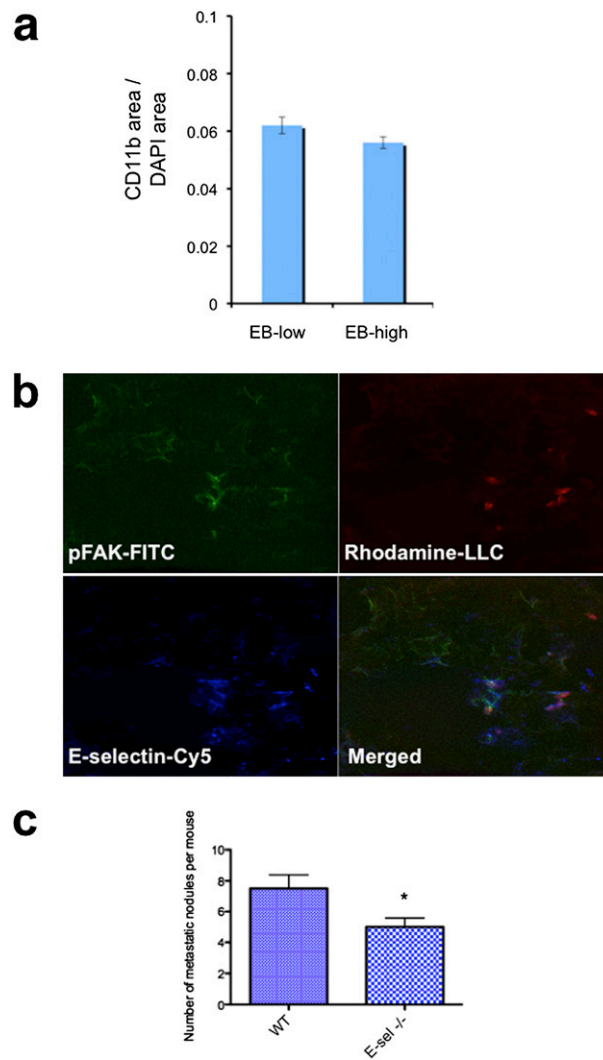

**Fig. S4.** (A) Immunohistochemical quantification of CD11b myeloid cells in the tumor-conditioned medium (TCM)-stimulated lungs of wild-type mice (3.5 h after i.v. TCM injection);  $n = 4$ . (B) Representative immunohistochemical image depicting colocalization of phosphorylated FAK expression (green), E-selectin expression (blue), and tumor cell homing (red). (C) Metastatic burden in mice after i.v. infusion of 200  $\mu$ L of LLC TCM followed by i.v. infusion of 50,000 LLC cells after 3.5 h: E-selectin deficiency reduces the number of lung metastases formed after 20 d. \* $P < 0.05$ ,  $n = 6$ .
